# Supplementary material for: The Extraverted Chameleon
Source: Atypon-hosted journal article supplement (doi:10.1027/1614-0001/a000159), 2015-04-10
Supplement: jid_36_2_80_esm1.pdf [file jid_36_2_80_esm1.pdf]

Kurzius, E. (2014). The extraverted chameleon. Personality's effects on mimicry of verbal behavior. *Journal of Individual Differences*.

Elena Kurzius, Department of Psychology, Martin-Luther-Universität Halle-Wittenberg, e-mail: elena.kurzius@psych.uni-halle.de

## Supplementary Material

### Questions Relating to Fairy Tales and Attitudes towards Morality Supplemented with Two Examples of the Confederates' Scripted Responses

#### 1) Questions for the first interaction

- 1 Would you read fairy tales to your children? Why? Why not?

*Answer*

Yes, I definitely would read fairy tales to my children... When I was younger, I also listened to fairy tales and I loved them. Uhm...I think that children learn and understand a lot, just by listening to fairy tales. They enjoy it, and hopefully will later always enjoy remembering them... Well, for example, Snow White or Hansel and Gretel, I mean that they maybe even learn not to go with strangers. Above that, I think that they maybe learn to intently listen and to associate that with fun.

Fairy tales just are terrific and in my opinion belong to a sociable party, especially at Christmas...

- 2 Did fairy tales influence you in your development/childhood? Elaborate on your experiences!
- 3 Which values does the tale you presented communicate?
- 4 Which tales gave negative feelings (e.g. fear) to you in your childhood? Why?

#### 2) Questions for the second interaction

- 5 Which values are important to you?
- 6 Which fairy tale did you like the most when you were a child? Why?
- 7 Fairy tales are said to exalt the imagination. Does the mental image of tales' protagonists change from childhood to adulthood? If so, in what way?
- 8 Do children already understand a tale's moral? From what age does their understanding increase when do they apply it to their own life?

*Answer*

Uhm, I believe, that children already at primary school can profit from a tale's moral. At this point, I think, they also already start to kind of implement it in their life. Especially things like "the good against the bad" or something. That's an important topic that even children understand. And also something like a sense of justice is important for kids. That's something they can see in class or so. That's where I think, that they already can understand the moral of a fairy tale, although maybe not always to the full extent.
