# Supplementary material for: The Extraverted Chameleon
Source: Atypon-hosted journal article supplement (doi:10.1027/1614-0001/a000159), 2015-04-10
Supplement: jid_36_2_80_esm2.pdf [file jid_36_2_80_esm2.pdf]

Kurzius, E. (2014). The extraverted chameleon. Personality's effects on mimicry of verbal behavior. *Journal of Individual Differences*.

Elena Kurzius, Department of Psychology, Martin-Luther-Universität Halle-Wittenberg,  
e-mail: elena.kurzius@psych.uni-halle.de

## Supplementary Material

### Instructions

“In our study we want to investigate the relationship between attitudes to morality and fairy tales. In order to do so, we would like to videotape the following conversations. Videotaping is necessary, so we do not need to make notes of the conversations. After having analyzed the data, the videos will be deleted. Do you agree with being videotaped?”

“In the first part of the study I will ask you to briefly retell a fairy tale. Following are two conversations with two other participants and finally you will get a questionnaire.”

“I do have three prepared lists which summarize three famous fairy tales, Little Red Riding Hood, Snow White, and Hansel and Gretel, in a few bullet points. Please choose one of these fairy tales and retell it. The bullet points shall serve you as a memory aid.” (Experimenter hands a sheet with five bullet points for the chosen fairy tale.) “I’ll give you some time to prepare.” (a maximum of three minutes)

“Please speak your participant code to the camera and then proceed with briefly retelling the fairy tale of your choice.” (five minutes maximum)

(After having brought the first confederate into the room.)

“I’m now going to ask you some questions. Please tell one another your answers to these questions. Simply share what comes to your mind. There are no right or wrong answers. We are now going to draw lots on who will first listen to the other’s thoughts and then answer the questions second.”

(After the four questions have been answered, the first confederate is thanked and brought in another room to ostensibly fill in a questionnaire, and the second confederate is brought into the experimental room.)

“I’m now again going to ask you some questions and would like you to again tell each other your answers to these questions. There are no right or wrong answers. Beforehand, you are again drawing lots to decide who of you will listen first and then answer the questions second.”
